# Supplementary material
Source: ML conference proceedings conference paper supplement (https://openaccess.thecvf.com/content/CVPR2024/html/Yu_CoGS_Controllable_Gaussian_CVPR_2024_paper.html)
Supplement: Supplementary file [file Yu_CoGS_Controllable_Gaussian_CVPR_2024_supplemental.pdf]

# CoGS : Controllable Gaussian Splatting

## Supplementary Material

### 6. Overview

This supplementary material offers comprehensive quantitative data and further qualitative insights, highlighting the advantages of our newly developed Dynamic 3D Gaussian Splatting (GS) and Controllable GS methods. In addition, we have included illustrative videos on the attached webpage, providing a dynamic visual representation of our methods in action.

### 7. Per-Scene Quantitative Results

For completeness, we provide detailed per-scene quantitative results for reconstruction quality metrics, including PSNR, SSIM, and LPIPS. These are presented for both synthetic (Tab. 3) and real (Tab. 4) dynamic scenes. This extension to Tables 1 and 2 from the main paper offers a more nuanced view, as it disaggregates the average performance metrics across different scenes. Our analysis reveals that our Dynamic GS method exhibits superior performance in synthetic scene datasets while achieving comparable results in real scenes. This difference in performance might be attributed to the challenges inherent in modeling the movement of Gaussians using a single camera setup.

### 8. More Qualitative Results

Additional qualitative results can be found on the project's website (<https://cogs2024.github.io>). For optimal viewing, please open the link using the Chrome browser.

Table 3. Per-scene quantitative results on synthetic dynamic scenes. We color code each row as **best**, **second best**, and **third best**.

| Method          | Hell Warrior    |                 |                    | Mutant          |                 |                    | Hook            |                 |                    | Bouncing Balls  |                 |                    |
|-----------------|-----------------|-----------------|--------------------|-----------------|-----------------|--------------------|-----------------|-----------------|--------------------|-----------------|-----------------|--------------------|
|                 | PSNR $\uparrow$ | SSIM $\uparrow$ | LPIPS $\downarrow$ | PSNR $\uparrow$ | SSIM $\uparrow$ | LPIPS $\downarrow$ | PSNR $\uparrow$ | SSIM $\uparrow$ | LPIPS $\downarrow$ | PSNR $\uparrow$ | SSIM $\uparrow$ | LPIPS $\downarrow$ |
| NeRF[24]        | 13.52           | 0.8100          | 0.2500             | 20.31           | 0.9100          | 0.0900             | 16.65           | 0.8400          | 0.1900             | 20.26           | 0.9100          | 0.2000             |
| DirectVoxGo[34] | 13.51           | 0.7500          | 0.2500             | 19.45           | 0.8900          | 0.1200             | 16.16           | 0.8000          | 0.2100             | 20.20           | 0.8700          | 0.2200             |
| Plenoxels[8]    | 15.19           | 0.7800          | 0.2700             | 21.44           | 0.9100          | 0.0900             | 17.90           | 0.8100          | 0.2100             | 21.30           | 0.8900          | 0.1800             |
| T-NeRF[32]      | 23.19           | 0.9300          | 0.0800             | 30.56           | 0.9600          | 0.0400             | 27.21           | 0.9400          | 0.0600             | 37.81           | 0.9800          | 0.1200             |
| D-NeRF[32]      | 25.10           | 0.9500          | 0.0600             | 31.29           | 0.9700          | 0.0200             | 29.25           | 0.9600          | 0.1100             | 38.93           | 0.9800          | 0.1000             |
| TiNeuVox-S[7]   | 27.00           | 0.9500          | 0.0900             | 31.09           | 0.9600          | 0.0500             | 29.30           | 0.9500          | 0.0700             | 39.05           | 0.9900          | 0.0600             |
| TiNeuVox-B[7]   | 28.17           | 0.9700          | 0.0700             | 33.61           | 0.9800          | 0.0300             | 31.45           | 0.9700          | 0.0500             | 40.73           | 0.9900          | 0.0400             |
| 3D GS [14]      | 29.72           | 0.9129          | 0.1215             | 23.59           | 0.9318          | 0.0631             | 21.88           | 0.8847          | 0.1104             | 23.03           | 0.9583          | 0.0737             |
| Ours            | 40.43           | 0.9812          | 0.0267             | 42.14           | 0.9937          | 0.0063             | 36.43           | 0.9838          | 0.0174             | 40.98           | 0.9958          | 0.0103             |

  

| Method           | Lego            |                 |                    | T-Rex           |                 |                    | Stand Up        |                 |                    | Jumping Jacks   |                 |                    |
|------------------|-----------------|-----------------|--------------------|-----------------|-----------------|--------------------|-----------------|-----------------|--------------------|-----------------|-----------------|--------------------|
|                  | PSNR $\uparrow$ | SSIM $\uparrow$ | LPIPS $\downarrow$ | PSNR $\uparrow$ | SSIM $\uparrow$ | LPIPS $\downarrow$ | PSNR $\uparrow$ | SSIM $\uparrow$ | LPIPS $\downarrow$ | PSNR $\uparrow$ | SSIM $\uparrow$ | LPIPS $\downarrow$ |
| NeRF [24]        | 20.30           | 0.7900          | 0.2300             | 24.29           | 0.9300          | 0.1300             | 18.19           | 0.8900          | 0.1400             | 18.28           | 0.8800          | 0.2300             |
| DirectVoxGo [34] | 21.13           | 0.9000          | 0.1000             | 23.27           | 0.9200          | 0.0900             | 17.58           | 0.8600          | 0.1600             | 17.80           | 0.8400          | 0.2000             |
| Plenoxels [8]    | 21.97           | 0.9000          | 0.1100             | 25.18           | 0.9300          | 0.0800             | 18.76           | 0.8700          | 0.1500             | 20.18           | 0.8600          | 0.1900             |
| T-NeRF [32]      | 23.82           | 0.9000          | 0.1500             | 30.19           | 0.9600          | 0.1300             | 31.24           | 0.9700          | 0.0200             | 32.01           | 0.9700          | 0.0300             |
| D-NeRF [32]      | 21.64           | 0.8300          | 0.1600             | 31.75           | 0.9700          | 0.0300             | 32.79           | 0.9800          | 0.0200             | 32.80           | 0.9800          | 0.0300             |
| TiNeuVox-S [7]   | 24.35           | 0.8800          | 0.1300             | 29.95           | 0.9600          | 0.0600             | 32.89           | 0.9800          | 0.0300             | 32.33           | 0.9700          | 0.0400             |
| TiNeuVox-B [7]   | 25.02           | 0.9200          | 0.0700             | 32.70           | 0.9800          | 0.0300             | 35.43           | 0.9900          | 0.0200             | 34.23           | 0.9800          | 0.0300             |
| 3D GS [14]       | 22.73           | 0.9282          | 0.0679             | 21.92           | 0.9537          | 0.0498             | 21.54           | 0.9283          | 0.0854             | 20.16           | 0.9279          | 0.0855             |
| Ours             | 25.16           | 0.9451          | 0.0421             | 37.25           | 0.9923          | 0.0115             | 43.35           | 0.9929          | 0.0092             | 37.48           | 0.9891          | 0.0158             |

Table 4. Per-scene quantitative results on real dynamic scenes. We color code each row as **best**, **second best**, and **third best**.

| Method         | torchocolate    |                 |                    | cut-lemon       |                 |                    | chickchicken    |                 |                    | hand            |                 |                    |
|----------------|-----------------|-----------------|--------------------|-----------------|-----------------|--------------------|-----------------|-----------------|--------------------|-----------------|-----------------|--------------------|
|                | PSNR $\uparrow$ | SSIM $\uparrow$ | LPIPS $\downarrow$ | PSNR $\uparrow$ | SSIM $\uparrow$ | LPIPS $\downarrow$ | PSNR $\uparrow$ | SSIM $\uparrow$ | LPIPS $\downarrow$ | PSNR $\uparrow$ | SSIM $\uparrow$ | LPIPS $\downarrow$ |
| NeRF [24]      | 22.5            | 0.866           | 0.373              | 24.1            | 0.826           | 0.437              | 18.8            | 0.761           | 0.453              | 23.8            | 0.773           | 0.469              |
| NV [21]        | 24.6            | 0.917           | 0.189              | 28.8            | 0.951           | 0.190              | 22.6            | 0.861           | 0.243              | 29.3            | 0.912           | 0.213              |
| NSFF [19]      | 22.3            | 0.883           | 0.253              | 28.0            | 0.904           | 0.238              | 27.7            | 0.939           | 0.173              | 24.9            | 0.797           | 0.329              |
| Nerfies [29]   | 27.8            | 0.959           | 0.169              | 30.8            | 0.946           | 0.223              | 28.7            | 0.948           | 0.141              | 29.9            | 0.940           | 0.171              |
| HyperNeRF [30] | 28.0            | 0.962           | 0.172              | 31.8            | 0.956           | 0.210              | 28.7            | 0.948           | 0.156              | 30.7            | 0.950           | 0.150              |
| TiNeuVox-S [7] | 21.5            | 0.754           | 0.478              | 23.4            | 0.642           | 0.604              | 25.3            | 0.761           | 0.485              | 24.2            | 0.604           | 0.614              |
| TiNeuVox-B [7] | 27.1            | 0.824           | 0.395              | 28.6            | 0.694           | 0.509              | 29.0            | 0.812           | 0.408              | 27.3            | 0.678           | 0.493              |
| 3D GS [14]     | 21.8            | 0.787           | 0.402              | 22.6            | 0.667           | 0.482              | 20.2            | 0.719           | 0.517              | 23.6            | 0.723           | 0.351              |
| Ours           | 28.3            | 0.949           | 0.174              | 31.4            | 0.945           | 0.205              | 28.8            | 0.942           | 0.146              | 30.8            | 0.947           | 0.161              |
